# Supplementary material for: m1A Regulator ALKBH1 and TRMT10B as Potential Prognostic Biomarkers and Related to Tumor Immune Microenvironment in Pancreatic Adenocarcinoma
Source: Research Square preprint supplement (doi:10.21203/rs.3.rs-1621316/v1), 2022-05-13
Supplement: Supplementary file 1 [file 2345d3b00f4e43e916bd1b84.xlsx]

## Sheet: Table 3 GO analysis for genes (
Table 3 GO analysis for genes (the enrichment of molecular function)
Item	ID	Description	P value	Rich factor
MF	GO:0046872	metal ion binding	3.93e-05	0.2871
MF	GO:0003723	RNA binding	0.00460137	0.1584
MF	GO:0000978	RNA polymerase II core promoter proximal region sequence-specific DNA binding	0.0057875	0.1386
MF	GO:0003713	transcription coactivator activity	0.0079965	0.0594
MF	GO:0035515	oxidative RNA demethylase activity	0.0194636	0.0198
MF	GO:0001228	transcriptional activator activity, RNA polymerase II transcription regulatory region sequence-specific binding	0.0282499	0.0693
MF	GO:0035064	methylated histone binding	0.0486832	0.0297
MF	GO:0032454	histone demethylase activity (H3-K9 specific)	0.0664985	0.0198
MF	GO:0003676	nucleic acid binding	0.0673029	0.0495
MF	GO:0001227	transcriptional repressor activity, RNA polymerase II transcription regulatory region sequence-specific binding	0.0804036	0.0495
MF	GO:0005515	protein binding	0.0846018	0.6832
MF	GO:0042800	histone methyltransferase activity (H3-K4 specific)	0.0936409	0.0198
MF	GO:0016706	oxidoreductase activity, acting on paired donors, with incorporation or reduction of molecular oxygen, 2-oxoglutarate as one donor, and incorporation of one atom each of oxygen into both donors	0.0980881	0.0198
MF: Molecular function
