# Supplementary material for: m1A Regulator ALKBH1 and TRMT10B as Potential Prognostic Biomarkers and Related to Tumor Immune Microenvironment in Pancreatic Adenocarcinoma
Source: Research Square preprint supplement (doi:10.21203/rs.3.rs-1621316/v1), 2022-05-13
Supplement: Supplementary file 2 [file 5548a65cf8b9ad4f88790c16.xlsx]

## Sheet: Table 4 Enrichment analysis of 
Table 4 Enrichment analysis of differentially expressed genes (DEGs) in the KEGG pathways
ID	Description	Gene ratio	P value	Adjusted P value	Count
hsa05168	Herpes simplex virus 1 infection	10/101	4.13e-06	0.000157	10
hsa00310	Lysine degradation	3/101	0.0135224	0.256925127 3
